# Supplementary material
Source: publisher figshare collection journal article supplement (https://rs.figshare.com/ndownloader/files/14172722)
Supplement: Supplementary file 1 [file 14172722]

SUPPLEMENTARY MATERIAL

Supplemental figure 1. Male size of nest owners and sneakers (mm) relative to non-reproducing males in 17°C and 21°C mating environments (mesocosms).

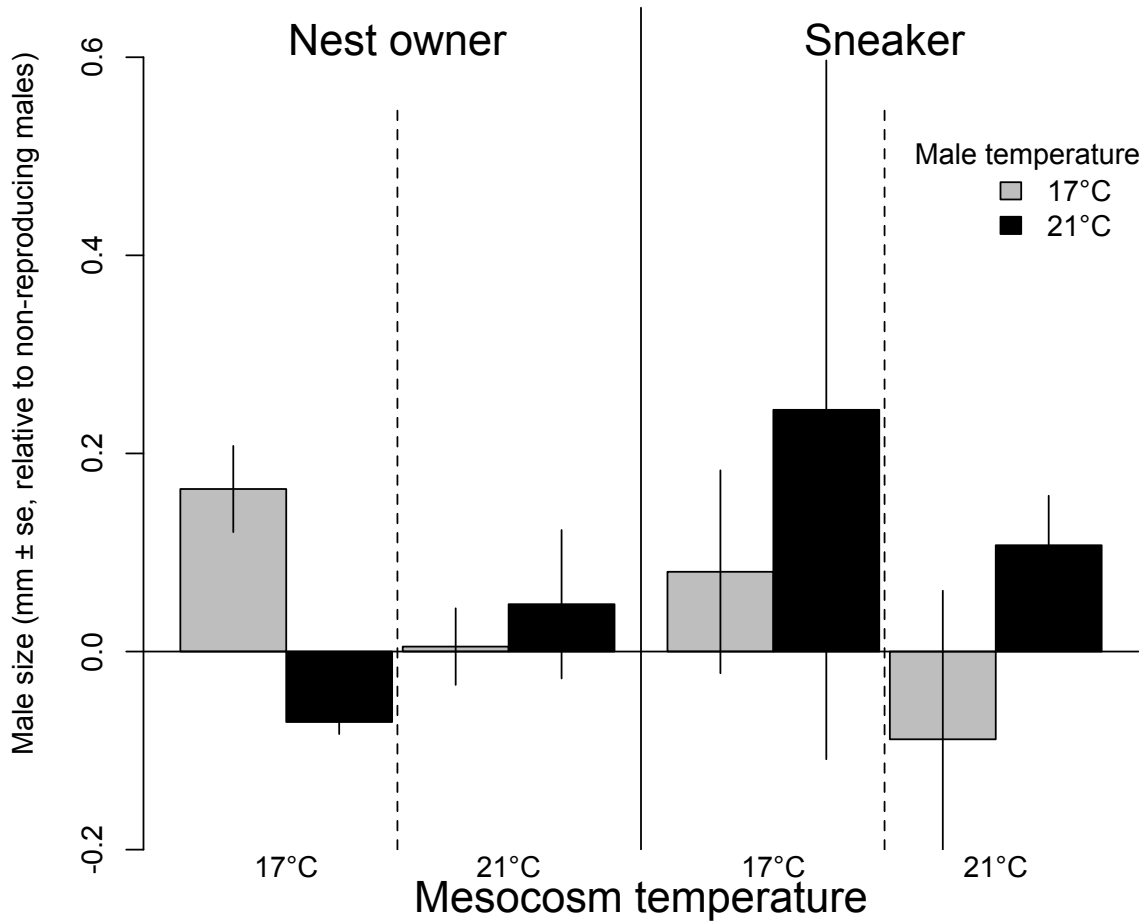

7 Supplemental table 1: GLMM for fixed effects of the model male size ~ male status (nest  
8 owner, no reproduction, sneaker) \* male temperature (17°C, 21°C) \* mesocosm temperature  
9 (17°C, 21°C). Mesocosm was fitted as a random effect.

|                                       | Effect             | Posterior mean | 95% CI                 | Effective sample | p            |
|---------------------------------------|--------------------|----------------|------------------------|------------------|--------------|
|                                       | (Intercept)        | 5.205          | 4.910 - 5.484          | 900              | <0.001       |
| <b>Male status (S)</b>                | No reproduction    | -0.026         | -0.075 - 0.032         | 900              | 0.342        |
|                                       | <b>Sneaker</b>     | <b>-0.152</b>  | <b>-0.277 - -0.037</b> | <b>900</b>       | <b>0.004</b> |
| <b>Male temperature (Male °C)</b>     | 21°C               | -0.113         | -0.211 - 0.014         | 999              | 0.060        |
| <b>Mesocosm temperature (Meso °C)</b> | 21°C               | -0.067         | -0.461 - 0.357         | 900              | 0.727        |
| <b>S*Male °C</b>                      | No repro:21°C      | <b>-0.108</b>  | <b>-0.229 - -0.002</b> | <b>1002</b>      | <b>0.045</b> |
|                                       | Sneaker:21°C       | 0.111          | -0.146 - 0.344         | 900              | 0.376        |
| <b>S*Meso °C</b>                      | No repro:21°C      | 0.021          | -0.050 - 0.102         | 900              | 0.633        |
|                                       | Sneaker:21°C       | 0.152          | -0.120 - 0.415         | 900              | 0.249        |
| <b>Male °C*Meso °C</b>                | 21°C:21°C          | 0.053          | -0.098 - 0.185         | 1010             | 0.480        |
| <b>S*Male °C*Meso °C</b>              | No repro:21°C:21°C | 0.074          | -0.076 - 0.217         | 1036             | 0.336        |
|                                       | Sneaker:21°C:21°C  | 0.002          | -0.418 - 0.417         | 900              | 0.996        |

10

11
